# Supplementary material for: Diet and dog characteristics affect major and trace elements in hair and blood of healthy dogs
Source: PubMed Central journal article supplement (PMC8791866; doi:10.1007/s11259-021-09854-8), 2021-11-06
Supplement: 11259_2021_9854_MOESM1_ESM.pdf [file 11259_2021_9854_MOESM1_ESM.pdf]

**Diet and dog characteristics affect major and trace elements in hair and blood of healthy dogs**Sarah Rosendahl<sup>1</sup>, Johanna Anturaniemi, Kristiina A. Vuori, Robin Moore, Manal Hemida, Anna Hielm-Björkman<sup>1</sup>Faculty of Veterinary Medicine, Department of Equine and Small Animal Medicine, University of Helsinki, Finland; sarah.rosendahl@helsinki.fi**Table S1** Results obtained for reference materials used for quality control of whole blood element analysis

| Element<br>(ng/g) | Seronorm Trace Elements Whole Blood L-1;<br>lot: 1702821 |         |                    |                    | Seronorm Trace Elements Whole Blood L-2;<br>lot: 1702825 |         |                    |                    |
|-------------------|----------------------------------------------------------|---------|--------------------|--------------------|----------------------------------------------------------|---------|--------------------|--------------------|
|                   | avg<br>(N=16)                                            | rsd (%) | reference<br>value | reference<br>range | avg<br>(N=16)                                            | rsd (%) | reference<br>value | reference<br>range |
| Fe                | 358097                                                   | 5.4     | 357000             | NA                 | 350956                                                   | 5.7     | 350000             | NA                 |
| Cu                | 557                                                      | 5.1     | 640                | 590-700            | 820                                                      | 6.4     | 980                | 890-1060           |
| Mn                | 17.4                                                     | 3.9     | 19.7               | 18.1-21.3          | 22.0                                                     | 7.1     | 24.2               | 22.2-26.1          |
| Zn                | 5483                                                     | 17.4    | 4600               | 3800-5300          | 6115                                                     | 5.9     | 5800               | 4800-6800          |
| Se                | 63.3                                                     | 7.2     | 69                 | 54-84              | 125                                                      | 4.2     | 144                | 113-175            |
| Cr                | <LOD                                                     | NA      | 0.77               | 0.61-0.92          | 9.47                                                     | 12.0    | 10.1               | 8.0-12.0           |
| Pb                | 9.42                                                     | 6.9     | 10                 | 7.9-12             | 272                                                      | 4.4     | 303                | 272-334            |
| Hg                | 1.44                                                     | 14.1    | 1.57               | 1.25-1.88          | 13.9                                                     | 8.7     | 16.6               | 13.3-20.0          |
| Cd                | 0.32                                                     | 13.3    | 0.28               | 0.23-0.34          | 5.09                                                     | 5.5     | 5.1                | 4.1-6.1            |
| As                | 1.92                                                     | 5.8     | 2.1                | 1.7-2.5            | 10.6                                                     | 5.8     | 12.2               | 9.8-14.7           |

avg, arithmetic mean; rsd, relative standard deviation; NA, not available; LOD, limit of detection
