# Supplementary material for: Diet and dog characteristics affect major and trace elements in hair and blood of healthy dogs
Source: PubMed Central journal article supplement (PMC8791866; doi:10.1007/s11259-021-09854-8), 2021-11-06

**Diet and dog characteristics affect major and trace elements in hair and blood of healthy dogs**

Sarah Rosendahl<sup>1</sup>, Johanna Anturaniemi, Kristiina A. Vuori, Robin Moore, Manal Hemida, Anna Hielm-Björkman

<sup>1</sup>Faculty of Veterinary Medicine, Department of Equine and Small Animal Medicine, University of Helsinki, Finland; sarah.rosendahl@helsinki.fi

**Fig. S2** Effect of dog characteristics and diet on blood manganese (a), lead (b), arsenic (c), and cadmium (d) levels in 50 healthy dogs. Original analysis results for individual dogs

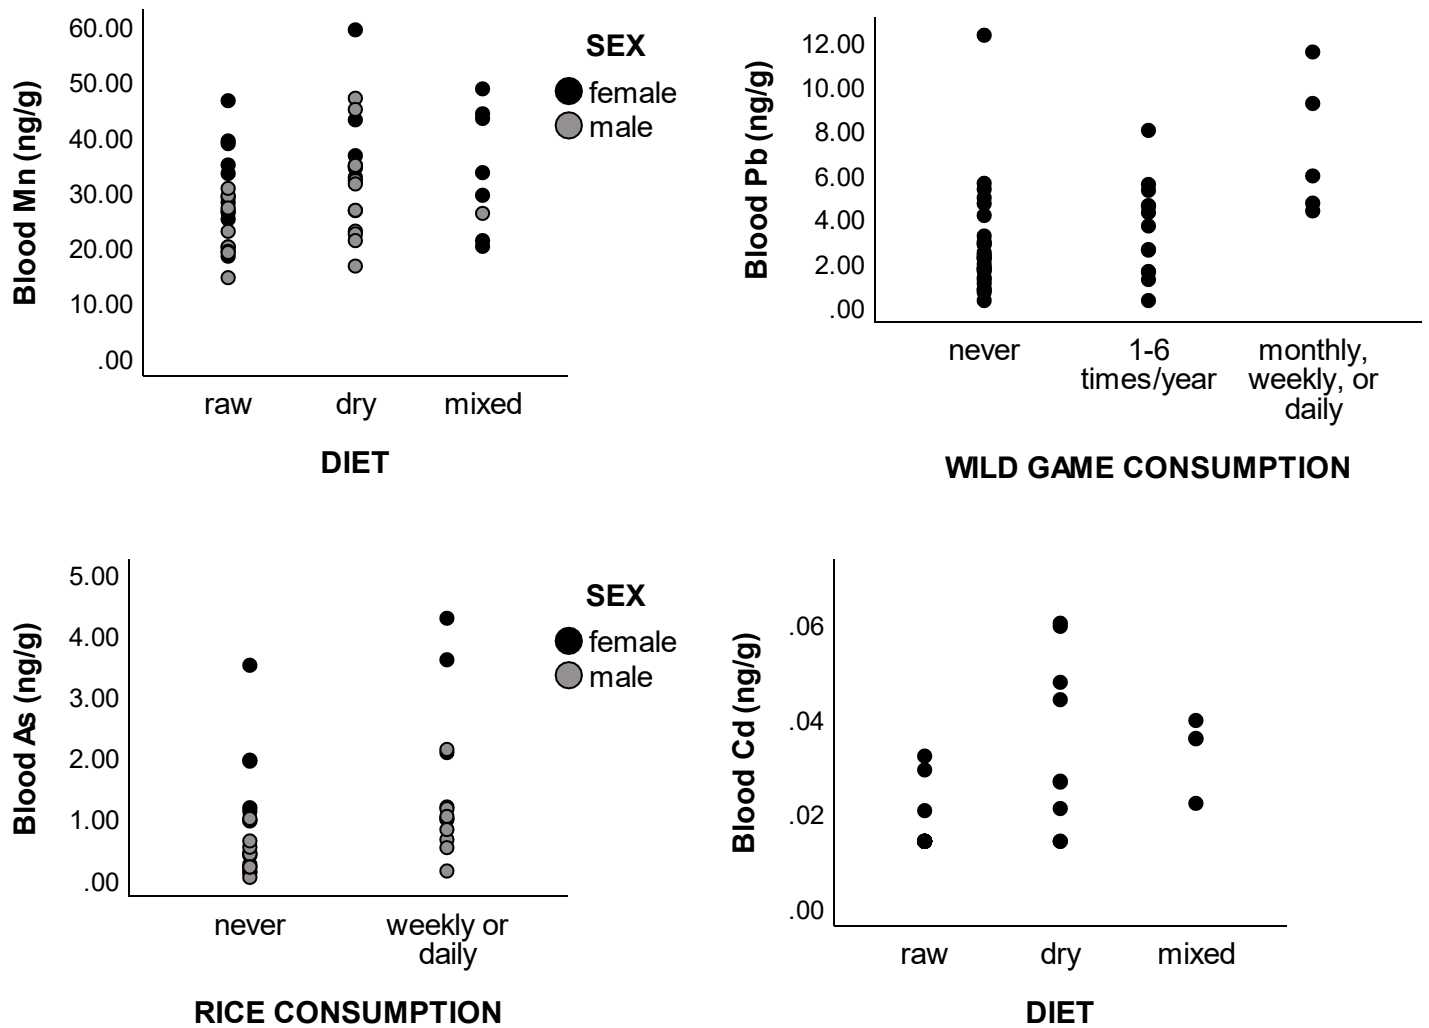

Supplement: 11259_2021_9854_MOESM3_ESM.pdf [file 11259_2021_9854_MOESM3_ESM.pdf]
